# Supplementary material for: Stem cell transplantation rescued a primary open-angle glaucoma mouse model
Source: eLife. 2021 Jan 28;10:e63677. doi: 10.7554/eLife.63677 (PMC7864631; doi:10.7554/eLife.63677)
Supplement: Figure 1—source data 1. [file elife-63677-fig1-data1.xlsx]

## Sheet: Fig1A
Raw Day-Time IOP data for Figure 1A
Day-time IOP (mmHg)
		WT					Tg					Tg-sham					Tg-TMSC
Baseline	Day 7	Day 14	Day 30	Day 60	Baseline	Day 7	Day 14	Day 30	Day 60	Baseline	Day 7	Day 14	Day 30	Day 60	Baseline	Day 7	Day 14	Day 30	Day 60
14	16	14	15	15	19	18	16	12	10	17	17	16	15	16	19	21	15	14	11
13	8	13	16	15	20	17	19	12	8	16	17	17	16	16	20	19	17	14	12
10	13	12	13	11	20	20	14	15	15	21	18	15	16	17	20	19	14	13	11
14	12	14	15	11	16	18	13	15	16	19	18	16	16	15	16	17	15	14	13
10	8	15	7	16	19	15	16	15	13	14	19	11	16	14	19	18	14	14	13
12	7	9	16	15	20	16	18	13	15	15	13	17	15	15	20	17	14	14	15
12	13	12	13	15	19	17	17	9	11	13	22	17	13	16	19	17	16	12	12
13	12	13	13	15	18	18	19	20	15	14	19	18	13	16	18	17	18	18	13
13	10	12	12	14	17	13	18	18	13	16	19	15	16	15	17	17	16	16	17
11	11	13	12	15	17	16	15	21	18	15	18	17	16	15	17	19	15	15	14
14	8	13	15	15	14	16	18	11	16	18	19	16	16	15	18	19	18	12	11
15	9	16	7	12	16	14	21	10	19	18	21	17	15	15	18	17	19	14	11
8	12	11	12	12	13	15	14	18	15	16	20	17	15	16	14	16	12	16	12
8	11	12	11	12	17	16	15	21	19	14	14	18	15	15	10	16	12	11	12
13	10	11	10	11	19	17	18	13	18	19	14	13	16	13	13	12	9	10	10
10	8	7	11	13	13	15	15	12	15	18	17	13	15	13	12	17	13	9	10
15	10	11	12	10	14	14	19	19	14	13	13	17	14	17	10	13	17	14	15
13	16	11	11	10	16	16	17	14	18	14	19	17	14	16	11	13	14	13	14
14	8	8	14	17	14	15	17	19	16	19	20	19	19	16	12	16	13	11	11
10	7	10	12	12	14	17	13	17	11	19	13	21	18	16	13	15	18	14	14
12	16	9	13	11	16	13	16	15	19	16	14	14	20	15	12	17	19	12	12
16	11	8	15	14	17	12	15	16	21	15	21	15	21	15	14	19	16	10	12
15	13	11	10	13	15	19	17	17	12	13	11	16	15	14	12	11	20	17	16
12	12	11	12	11	14	20	14	13	13	14	11	17	15	14	14	10	13	12	15
12	11	10	11	12	17	15	17	15	13	17	16	18	19	17	12	13	10	14	12
13	14	8	12	12	15	14	14	16	16	15	17	13	17	16	13	14	11	13	11

## Sheet: Fig1B
Raw night IOP data for Figure 1B
Night IOP (mmHg)
WT	Tg	WT	Tg-TMSC
16	21	10	11
15	16	9	10
18	17	10	10
12	16	13	10
15	16	12	11
14	16	13	10
14	16	17	10
14	16	19	10
14	16	11	10
11	23	11	9
10	21	10	10
10	22	12	12
9	18	11	15
15	16	10	15
18	16	10	14
12	20	10	12
9	16	10	14
	18		16
	17		18
	19		12
	17		13
	16		10
	17		10
	16		10

## Sheet: Fig1C
Individual outflow facility for Figure 1C
Outflow facility(μL/min/mmHg)
WT	Tg	Tg-sham	Tg-TMSC
0.0141	0.0084	0.0111	0.019
0.0189	0.0086	0.0056	0.0258
0.014	0.0114	0.0152	0.0156
0.0185	0.01	0.0115	0.0122
0.0182	0.0112	0.0073	0.014
0.0182	0.0078	0.001	0.01

## Sheet: Fig1E
Individual central corneal thickness for Figure 1E
Central corneal thickness(µm)
WT	Tg	Tg-sham	Tg-TMSC
96	91	109	102
91	109	108	103
99	95	100	92
103	91	95	89
102	93	100	101
91	110	105	113
91	91	110	97
92	93	112	105
