# Supplementary material for: Stem cell transplantation rescued a primary open-angle glaucoma mouse model
Source: eLife. 2021 Jan 28;10:e63677. doi: 10.7554/eLife.63677 (PMC7864631; doi:10.7554/eLife.63677)
Supplement: Figure 2—source data 1. [file elife-63677-fig2-data1.xlsx]

## Sheet: Fig2B
Individual P1 amplitude in pattern electroretinogram for Figure 2B
The P1 amplitude of PERG (µV)
WT	Tg	Tg-sham	Tg-TMSC
10.8	4.43	7.463	8.533
4.9	3.769	4.327	9.957
10.63	5.322	7.2	11.2
8.86	6.072	8.29	9.418
12.77	5.673	5.747	8.417
15.03	7.957	5.089	6.867
10.92	8.652	6.978	9.088
9.938	5.943	4.687	9.144
13.22	10.21	7.68	7.933
11.33	7.54	3.035	11.47

## Sheet: Fig2C
Individual retinal ganglion cell count of each section for Figure 2C
RGC count (RGC# / mm)
WT	Tg	Tg-sham	Tg-TMSC
67.984	37.9555	51.9871	46.3726
50.4064	51.5901	46.9925	42.129
76.8233	66.2442	76.2513	49.1266
62.6954	66.1946	61.1681	55.2168
66.6688	42.486	47.2406	46.2082
57.439	44.5477	66.9643	46.8555
77.7908	60.7072	51.6917	68.3891
69.0749	72.7704	53.9416	64.1326
75.0866	37.9537	49.2234	45.8892
48.344	43.7881	63.489	37.3754
83.5291	51.9117	61.0162	60.8967
77.6867	72.4308	49.3782	67.9404
61.7028	59.4759	56.0371	60.4189
59.0521	65.0289	64.2353	78.2289
82.5561	58.825	36.9762	53.816
94.5964	39.4518	38.4882	64.7083
56.0089	65.9341	52.2377	56.5011
55.9448	44.8345	67.8891	82.6207
78.5414	51.3637	56.3514	76.0714
111.948	39.1986	38.7389	61.2694
56.391	61.3413	55.0306	62.7323
49.9748	60.2679	62.0671	79.6742
99.3736	43.7318	62.5	85.2711
96.4286	42.6188	38.508	59.5776
55.7391	49.0059	56.8297	67.1338
60.0495	34.5336	54.742	79.4196
93.8274	44.8577	51.3065	80.9353
97.035	39.7735	41.2399	66.0855
62.1719	49.5123	61.4886	47.1896
81.4889	46.5442	69.452	62.8964
74.5508	35.1038	61.5174	45.1856
72.0551	27.4614	48.3509	57.3454
55.2692	52.0892	53.2951	46.5839
68.1678	48.2005	62.2047	47.1764
54.878	43.1948	61.4259	62.7541
57.6752	36.2419	48.8588	59.9315
71.5548	50.1797	62.2738	51.7506
84.6583	45.5097	51.5594	58.5536
67.8186	41.6281	53.7313	65.5359
62.6305	28.5138	45.5513	61.463
75.458			55.3424
84.8894			67.1662
78.9363			59.5238
			48.2766
			49.869
			71.9395
			80.7823
			56.1835
			50.5667
			78.2633
			64.5044
			57.1772
			56.7355
			65.3246
			56.7348
			60.3259
			39.3787
			70.2205
			64.6008
			65.0916
			29.2969
			80.3571
			53.1029
			58.542
			61.7444
			71.6941
			59.411
			45.8588
			72.3112
			73.1147
			55.5222
			77.1316
			69.6738
			63.142
			47.895
			57.052
			72.5348
			69.5398
			64.9696
			68.3644
			75.9402
			57.2874
			55.6228
