# Supplementary material for: Stem cell transplantation rescued a primary open-angle glaucoma mouse model
Source: eLife. 2021 Jan 28;10:e63677. doi: 10.7554/eLife.63677 (PMC7864631; doi:10.7554/eLife.63677)
Supplement: Figure 3—source data 1. [file elife-63677-fig3-data1.xlsx]

## Sheet: Fig3B
Individual TM cell count of each section for Figure 3B
TM cellularity (Cells/section)
WT	Tg	Tg-sham	Tg-TMSC
45	17	19	32
47	19	25	22
45	20	20	34
30	21	15	31
37	20	10	20
32	25	19	31
37	19	20	32
39	22	18	39
35	29	15	30
21	21	18	22
20	15	12	28
36	16	20	31
		11	30
			22
