# Supplementary material for: Stem cell transplantation rescued a primary open-angle glaucoma mouse model
Source: eLife. 2021 Jan 28;10:e63677. doi: 10.7554/eLife.63677 (PMC7864631; doi:10.7554/eLife.63677)
Supplement: Figure 4—source data 1. [file elife-63677-fig4-data1.xlsx]

## Sheet: Fig4D
Individual TUNEL positive cells per TM region per section for Figure 4D
TUNEL quantification: TUNEL+ cells/TM region
Tg	Tg-TMSC
11	2
12	1
8	5
7	4
11	4
5	0
6	1
7	1
1	1
12	0
5	0
8
12
7
