# Supplementary material for: Stem cell transplantation rescued a primary open-angle glaucoma mouse model
Source: eLife. 2021 Jan 28;10:e63677. doi: 10.7554/eLife.63677 (PMC7864631; doi:10.7554/eLife.63677)
Supplement: Figure 5—source data 1. — Relative myocilin protein levels in the aqueous humor of each eye for Figure 5C; Relative extracellular mactrix protein levels in the corneal limbus for Figure 5D. [file elife-63677-fig5-data1.xlsx]

## Sheet: Fig5B
Relative myocilin protein levels in the corneal limbus for Figure 5B
Myoc protein quantificationin the limbus
WT	Tg	Tg-sham	Tg-TMSC
0.157523	0.889412	1.46595	0.806965
0.0286605	0.557818	0.817478	0.0849103
0.0748316	1.06251	1.49371	0.344462
0.327533	0.545538	0.4817	0.285393
0.190076	0.631658	0.605419	0.210731

## Sheet: Fig5C
Relative myocilin protein levels in the aqueous humor of each eye for Figure 5C
Myoc protein quantification in the aqueous humor
WT	Tg	Tg-sham	Tg-TMSC
1.08	0.32	0.14	0.56
0.92	0.77	0.5	0.98
0.99	0.08	0.25	0.72
1.25	0.21	0.02	0.51
0.76	0.08	0.25	0.65

## Sheet: Fig5D
Relative extracellular mactrix protein levels in the corneal limbus for Figure 5D
ECM protein quantification in the limbus
	Fibronectin				Collagen IV				Elastin
WT	Tg	Tg-sham	Tg-TMSC	WT	Tg	Tg-sham	Tg-TMSC	WT	Tg	Tg-sham	Tg-TMSC
0.34	1.11	1.44	0.69	0.5	0.45	0.78	0.7	0.27	0.56	0.69	0.26
0.76	0.72	0.87	0.45	0.91	0.57	0.9	0.32	0.23	0.63	0.53	0.16
0.52	1.23	1.65	0.69	0.93	0.66	0.7	0.67	0.12	0.57	0.57	0.19
0.57	0.82	0.83	0.41	0.37	0.57	0.93	0.57	0.19	0.59	0.64	0.17
0.59	0.65	0.6	0.58	0.89	0.68	0.7	0.69
0.81	0.94	0.8	0.67	0.74	0.68	0.59	0.89
