# Supplementary material for: Stem cell transplantation rescued a primary open-angle glaucoma mouse model
Source: eLife. 2021 Jan 28;10:e63677. doi: 10.7554/eLife.63677 (PMC7864631; doi:10.7554/eLife.63677)
Supplement: Figure 6—source data 1. [file elife-63677-fig6-data1.xlsx]

## Sheet: Fig6A
Relative ER stress protein levels in the corneal limbus for Figure 6A
ER stress protein quantification
CHOP				GRP78
WT	Tg	Tg-sham	Tg-TMSC	WT	Tg	Tg-sham	Tg-TMSC
0.24	0.93	0.72	0.51	1.08	1.48	1.68	1.5
0.47	0.88	0.74	0.35	1.12	1.53	1.64	1.29
0.24	0.8	1.14	0.95	1.13	1.78	1.85	1.63
0.63	1.21	0.77	1.06	1.19	1.6	1.77	1.34
0.6	0.65	0.53	0.5	0.57	0.89	0.64	0.57
0.37	0.68	0.41	0.68	0.65	0.9	0.64	0.66

## Sheet: Fig6C
Relative ER sizes of the TM cells for Figure 6C
ER size quantification: area (nm2/perimeter (nm)
WT	Tg	Tg-sham	Tg-TMSC
5.00481	22.2551	15.6076	6.33949
5.17577	7.24912	15.4842	5.83166
5.08373	76.7591	33.6717	5.91998
11.1829	20.737	34.7131	15.8995
5.63315	31.8857	49.1147	18.3632
5.52893	23.9645	58.7557	16.7613
8.27364	30.7151	9.98426	17.9828
4.29687	32.9328	48.1034	16.2948
5.2769	21.8297	25.7037	12.4855
3.24101	32.8613	16.8894	20.8334
4.08595	23.6055	10.263	8.47292
8.88005	16.1067	9.28109	11.02
6.43415	11.7468	12.1092	14.4956
8.0532	27.8293	6.53685	14.4216
9.95145	13.3599	20.3656	15.6708
9.11488	29.0947	20.3823	9.13464
4.82023	11.5487	29.4528	16.7707
12.3246	16.2685		12.6294
6.42344	29.3075		22.5788
5.03032	19.482		15.3897
7.80392	17.1464		12.1161
11.8653	24.2406
8.30808	23.3403
