# Supplementary material for: Stem cell transplantation rescued a primary open-angle glaucoma mouse model
Source: eLife. 2021 Jan 28;10:e63677. doi: 10.7554/eLife.63677 (PMC7864631; doi:10.7554/eLife.63677)
Supplement: Figure 7—source data 1. — Relative protein levels by WB in the TM cells with different culture conditions for Figure 7F. [file elife-63677-fig7-data1.xlsx]

## Sheet: Fig7D
Percentage of BrdU positive TM cells in different culture conditions for Figure 7D
% of EdU+ cells
Y437H TM	Y437H TM+TMSC	Y437H TM+TMSC Contact
3.16	9.63	9.18
8.82	4.37	6.79
4.67	4.19	3.56
9.4
6.59

## Sheet: Fig7F
Relative protein levels by WB in the TM cells with different culture conditions for Figure 7F
				Co-culture with TMSC
GRP78	TM	Y437H TM	GFP TM	TM	Y437H TM	GFP TM
	0.69	1.21	0.77	0.82	1.33	0.66
	0.71	1.42	0.69	0.72	1.27	0.71
	0.57	1.33	0.63	0.76	1.21	0.59
					TMSC
CHOP	TM	Y437H TM	GFP TM	TM	Y437H TM	GFP TM
	0.07	0.24	0.05	0.02	0.13	0.05
	0.1	0.21	0.03	0.04	0.37	0.13
	0.03	0.19	0.07	0.07	0.21	0.03
				Co-culture with TMSC
Myoc	TM	Y437H TM	GFP TM	TM	Y437H TM	GFP TM
	0.1	0.91	0.04	0.16	1.01	0.09
	0.12	0.89	0.11	0.09	0.89	0.16
	0.09	0.97	0.02	0.13	0.93	0.09
