# Supplementary material for: Stem cell transplantation rescued a primary open-angle glaucoma mouse model
Source: eLife. 2021 Jan 28;10:e63677. doi: 10.7554/eLife.63677 (PMC7864631; doi:10.7554/eLife.63677)
Supplement: Figure 8—source data 1. — Relative myocilin protein levels by WB in TMSC with different culture conditions for Figure 8C; Individual percentage of phagocytic cells per field for Figure 8E. [file elife-63677-fig8-data1.xlsx]

## Sheet: Fig8B
Relative CHI3L1 protein levels by WB in TMSC with different culture conditions for Figure 8B
CHI3L1
TMSC	TM+TMSC	Y437H TM+TMSC
0.17	0.47	0.62
0.21	0.65	0.72
0.11	0.56	0.53

## Sheet: Fig8C
Relative myocilin protein levels by WB in TMSC with different culture conditions for Figure 8C
Myocilin
TMSC	TM+TMSC	Y437H TM+TMSC
0.12	0.46	0.53
0.16	0.51	0.43
0.14	0.42	0.57

## Sheet: Fig8E
Individual percentage of phagocytic cells per field for Figure 8E
Phagocytosis
TMSC	TM+TMSC	Y437H TM+TMSC
22	80	86
33	57	76
30	83	64
16	70	77
33	75	81
41	90	76
23	87	70
12	60	75
55	75	78
20	45	50
