# Supplementary material for: Stem cell transplantation rescued a primary open-angle glaucoma mouse model
Source: eLife. 2021 Jan 28;10:e63677. doi: 10.7554/eLife.63677 (PMC7864631; doi:10.7554/eLife.63677)
Supplement: Figure 9—source data 1. — Related neuroprotection related gene expression increase (p<0.05) in three individual TMSCs as compared to fibroblasts for Figure 9B. [file elife-63677-fig9-data1.xlsx]

## Sheet: Fig 9A
Related gene expression increase (p<0.05) in three individual TMSCs as compared to fibroblasts for Figure 9A
ID	baseMean	log2FoldChange	lfcSE	stat	pvalue	padj	Fibro.3	Fibro.2	Fibro.1	TMSC.3	TMSC.2	TMSC.1
ITGA3	8277.66	-1.38642	0.439727	-3.15291	0.00161653	0.0323251	4260.6	5259.62	4221.23	19514.2	5667.24	10743.1
CHI3L1	763.088	-3.29936	0.904847	-3.64631	0.000266031	0.00816437	48.4043	351.592	22.1283	2131.66	482.789	1541.96
VTN	169.371	-2.92422	0.838923	-3.48568	0.000490884	0.0129684	39.1354	26.4968	52.6863	36.5823	207.304	654.02
FST	13170.2	-2.27447	0.651303	-3.49218	0.000479087	0.0128125	5435.69	2775.03	5324.48	47082.4	9800.43	8603.46
COL4A6	2016.05	-5.13007	0.596451	-8.60099	7.90284e-18	1.06488e-14	189.498	66.242	80.0832	4491.71	5919.69	1349.09
LOX	6024.32	2.75948	0.658621	4.18978	2.7922e-05	0.00133272	8841.5	10320.5	12332.8	635.74	564.789	3450.55

## Sheet: Fig9B
Related neuroprotection related gene expression increase (p<0.05) in three individual TMSCs as compared to fibroblasts for Figure 9B
Dopaminergic synapse
ID	baseMean	log2FoldChange	lfcSE	stat	pvalue	padj	Fibro.3	Fibro.2	Fibro.1	TMSC.3	TMSC.2	TMSC.1
FOS	176.09	-2.14692	0.295377	-7.26842	3.6373e-13	1.82041e-10	52.5238	64.2038	77.9758	228.392	304.047	329.397
GRIN2A	35.4027	-5.06056	1.32007	-3.83356	0.000126302	0.00454298	2.05976	3.05732	1.05373	37.571	166.765	1.90955
MAOB	58.6999	-2.33434	0.666685	-3.50142	0.000462789	0.0124889	20.5976	6.11465	31.6118	148.306	93.0567	52.5125
CACNA1A	823.595	-1.577	0.296431	-5.31993	1.03806e-07	1.14363e-05	433.579	472.866	334.031	1265.55	1555.24	880.301
KIF5C	236.067	-4.50703	1.43834	-3.13349	0.00172741	0.0340755	19.5677	29.5541	10.5373	218.505	1127.74	10.5025
KCNJ6	154.652	-9.70374	2.08231	-4.66008	3.16091e-06	0.000214611	1.02988	0	0	141.385	771.173	14.3216
GNGT2	12.188	-4.49735	1.32295	-3.39948	0.000675141	0.0163801	0	2.03822	1.05373	42.5145	4.60677	22.9146
PLCB1	2460.79	-2.7236	0.4288	-6.35168	2.12982e-10	5.1107e-08	1040.18	394.395	506.843	2894.94	5036.12	4892.26
Ephrin signaling
EPHA7	86.6428	-8.86647	2.4728	-3.58559	0.000336311	0.00989627	1.02988	0	0	487.434	29.4833	1.90955
EPHA2	4300.12	-1.86706	0.268654	-6.94968	3.66107e-12	1.52693e-09	1503.62	1827.26	2220.2	8203.32	5160.5	6885.82
EPHB6	1294.78	-1.7989	0.543519	-3.30972	0.000933889	0.021273	660.152	485.095	589.033	782.069	1443.76	3808.59
EFNB2	1453	-2.06556	0.673608	-3.06641	0.00216645	0.0402863	179.199	486.114	1015.79	3976.59	2125.56	934.723
GABAergic synapse
KCNJ6	154.652	-9.70374	2.08231	-4.66008	3.16091e-06	0.000214611	1.02988	0	0	141.385	771.173	14.3216
PLCL1	9.75298	-4.77395	1.47769	-3.23068	0.00123495	0.0262213	2.05976	0	0	13.8419	35.9328	6.68341
GNGT2	12.188	-4.49735	1.32295	-3.39948	0.000675141	0.0163801	0	2.03822	1.05373	42.5145	4.60677	22.9146
CACNA1A	823.595	-1.577	0.296431	-5.31993	1.03806e-07	1.14363e-05	433.579	472.866	334.031	1265.55	1555.24	880.301
Serotonergic synapse
CACNA1A	823.595	-1.577	0.296431	-5.31993	1.03806e-07	1.14363e-05	433.579	472.866	334.031	1265.55	1555.24	880.301
KCNJ6	154.652	-9.70374	2.08231	-4.66008	3.16091e-06	0.000214611	1.02988	0	0	141.385	771.173	14.3216
GNGT2	12.188	-4.49735	1.32295	-3.39948	0.000675141	0.0163801	0	2.03822	1.05373	42.5145	4.60677	22.9146
PLCB1	2460.79	-2.7236	0.4288	-6.35168	2.12982e-10	5.1107e-08	1040.18	394.395	506.843	2894.94	5036.12	4892.26
HTR2A	94.1794	-4.28083	1.23216	-3.47425	0.000512279	0.0133735	10.2988	17.3248	0	60.3113	454.227	22.9146
DUSP1	5655.77	-1.82642	0.555728	-3.28653	0.0010143	0.0225763	1787.87	1221.91	4454.1	7105.86	5285.8	14079.1
MAOB	58.6999	-2.33434	0.666685	-3.50142	0.000462789	0.0124889	20.5976	6.11465	31.6118	148.306	93.0567	52.5125
KCNN2	21.0467	-4.27686	1.04725	-4.08391	4.42846e-05	0.00194443	1.02988	3.05732	2.10745	25.7064	82.9218	11.4573
TGF-β signaling
TGFB3	1974.78	-2.28109	0.454146	-5.02282	5.09184e-07	4.57404e-05	549.955	999.745	472.07	1817.25	4972.54	3037.13
INHBA	4041.51	-2.06188	0.453949	-4.54211	5.56946e-06	0.000349678	1588.07	2313.37	783.973	5704.85	4546.88	9311.9
FST	13170.2	-2.27447	0.651303	-3.49218	0.000479087	0.0128125	5435.69	2775.03	5324.48	47082.4	9800.43	8603.46
BMP2	903.083	-1.89619	0.420678	-4.50746	6.56082e-06	0.000406099	326.471	209.936	611.162	1112.3	1625.27	1533.37
BMP4	402.38	-1.47258	0.384067	-3.83416	0.000125992	0.00454116	249.23	271.083	119.071	723.735	448.699	602.462
BMP6	527.301	-1.6444	0.500694	-3.28423	0.00102261	0.0227322	363.547	132.484	270.808	470.626	1274.23	652.11
ID4	4718.9	-3.4098	0.439255	-7.7627	8.31406e-15	5.8255e-12	883.635	645.095	906.205	14782.2	5424.93	5671.35
CDKN2B	869.239	-2.13741	0.568311	-3.76099	0.000169244	0.00576778	364.577	134.522	466.801	2454.97	932.409	862.16
NBL1	3171.58	-1.94135	0.490026	-3.96172	7.44107e-05	0.00299644	1924.84	929.426	1076.91	6458.25	6519.5	2120.55
Glutamatergic synapse
GRIN2A	35.4027	-5.06056	1.32007	-3.83356	0.000126302	0.00454298	2.05976	3.05732	1.05373	37.571	166.765	1.90955
CACNA1A	823.595	-1.577	0.296431	-5.31993	1.03806e-07	1.14363e-05	433.579	472.866	334.031	1265.55	1555.24	880.301
GNGT2	12.188	-4.49735	1.32295	-3.39948	0.000675141	0.0163801	0	2.03822	1.05373	42.5145	4.60677	22.9146
PLCB1	2460.79	-2.7236	0.4288	-6.35168	2.12982e-10	5.1107e-08	1040.18	394.395	506.843	2894.94	5036.12	4892.26
